# Supplementary material
Source: PubMed Central journal article supplement (PMC4910091)

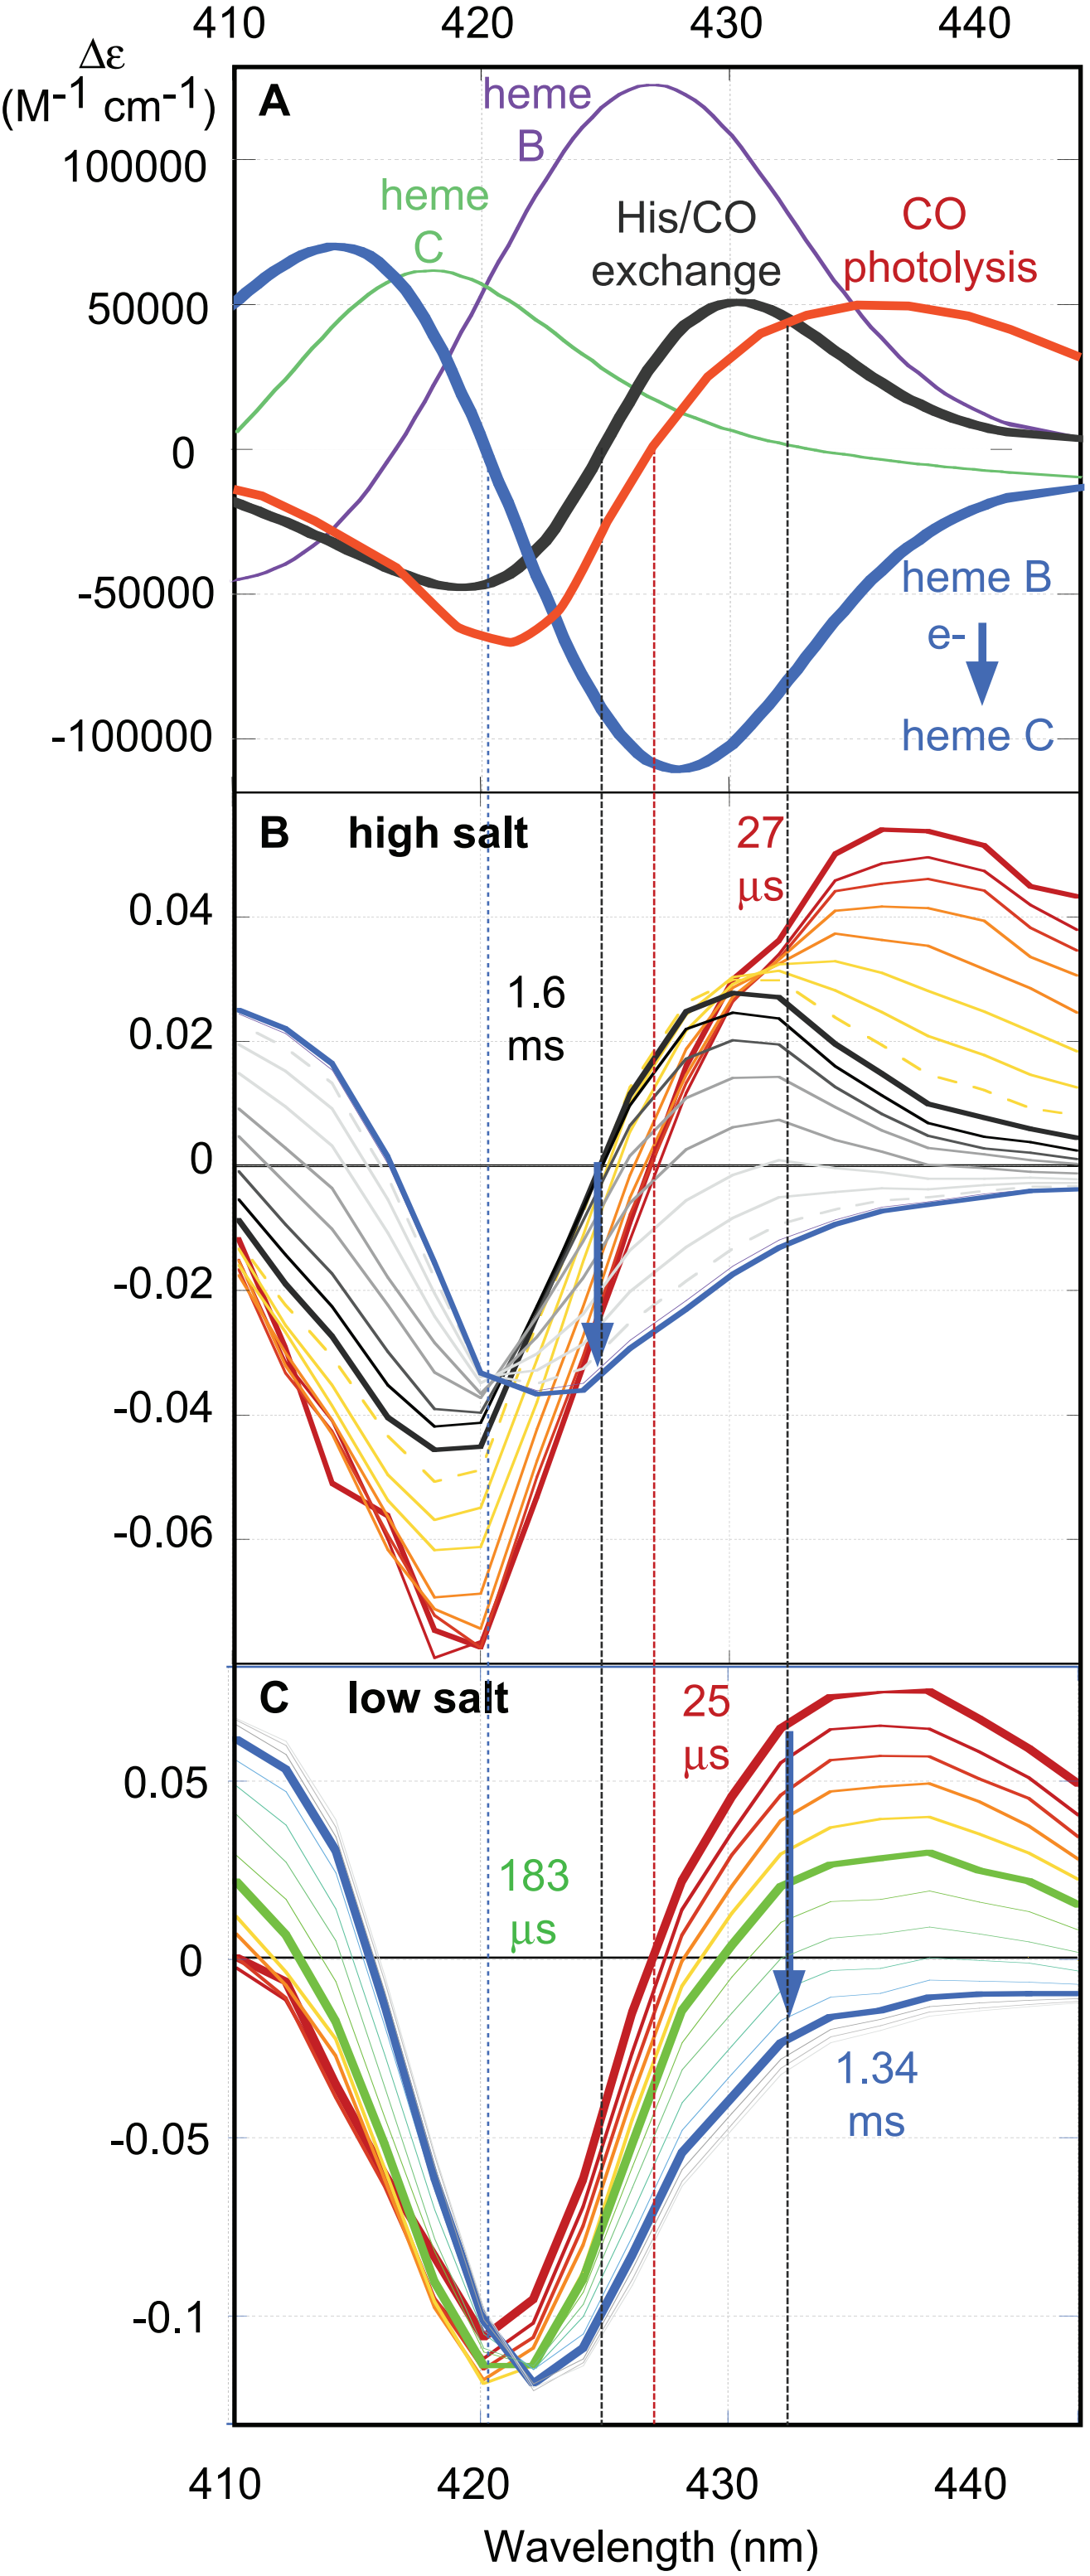

Supplement: NIHMS731279-supplement-1.pdf [file NIHMS731279-supplement-1.pdf]
